# Supplementary material for: Exposure to Batrachochytrium dendrobatidis metabolites altered ghost shrimp behavior and reduced mortality
Source: PeerJ. 2025 Aug 7;13:e19815. doi: 10.7717/peerj.19815 (PMC12335830; doi:10.7717/peerj.19815)
Supplement: Supplemental Information 1 — All heart rate, behavioral and other significant measurements for ghost shrimp exposed to Bd metabolites or ASW control. [file peerj-13-19815-s001.xlsx]

## Sheet: Mortality Data
Shrimp	Treatment	Expt day.After exposure	Death status
1	ASW control	2	1
4	ASW control	5	0
5	ASW control	4	1
6	ASW control	4	1
7	ASW control	3	1
8	ASW control	1	1
9	ASW control	2	1
11	ASW control	5	0
13	ASW control	3	1
15	ASW control	5	0
16	ASW control	2	1
18	ASW control	4	1
19	ASW control	3	1
20	ASW control	5	0
23	Bd Metabolites	5	0
24	Bd Metabolites	5	1
25	Bd Metabolites	5	0
26	Bd Metabolites	5	0
27	Bd Metabolites	5	0
29	Bd Metabolites	5	0
31	Bd Metabolites	5	0
32	Bd Metabolites	5	0
33	Bd Metabolites	5	0
34	Bd Metabolites	1	1
36	Bd Metabolites	2	1
38	Bd Metabolites	5	0
39	Bd Metabolites	5	0

## Sheet: Gill Data
shrimp	treatment	average	Expt day.After exposure
1	ASW control	40.3333	2
4	ASW control	5.33333	5
5	ASW control	8.33333	4
6	ASW control	6	4
7	ASW control	17.6667	3
8	ASW control	10.3333	1
9	ASW control	3.33333	2
11	ASW control	10.3333	5
13	ASW control	1.66667	3
15	ASW control	10	5
16	ASW control	14	2
18	ASW control	6.33333	4
19	ASW control	3.33333	3
20	ASW control	10	5
23	Bd Metabolites	5.33333	5
24	Bd Metabolites	6.33333	5
25	Bd Metabolites	8	5
26	Bd Metabolites	6.33333	5
27	Bd Metabolites	7.66667	5
29	Bd Metabolites	25.3333	5
31	Bd Metabolites	13	5
32	Bd Metabolites	66.6667	5
33	Bd Metabolites	34.6667	5
34	Bd Metabolites	4	1
36	Bd Metabolites	11.6667	2
38	Bd Metabolites	15.6667	5
39	Bd Metabolites	46.6667	5

## Sheet: length, heartrate + Poke
Shrimp	Treatment	initial length	initial heart rate	final heart rate	poke status	Final Length
1	ASW control	23.24	12	9		28
2	ASW control	26.46	12	11		29
3	ASW control	23.72	9			26
4	ASW control	25.93	13	12	1
5	ASW control	30.67	11	14		32
6	ASW control	29.42	12	9		29
7	ASW control	31.2	12	9		30.5
8	ASW control	27.03	9	8		28
9	ASW control	29.89	10	10		22
10	ASW control	24.86	8	6		24
11	ASW control	26.82	9	10	1
12	ASW control	20.77	10	8		23
13	ASW control	26.58	11	9		30
14	ASW control	29.86	11	12		28
15	ASW control	31.73	12	8	1
16	ASW control	19.61	14	11		18
17	ASW control	24.16	11	9		27
18	ASW control	22.51	12	11		23
19	ASW control	19.94	13	13		27
20	ASW control	23.43	11	10	1
21	Bd Metabolites	32.27	10	7		28
22	Bd Metabolites	29.28	10	5		27
23	Bd Metabolites	29.72			0
24	Bd Metabolites	33.12	9
25	Bd Metabolites	21.41	11		0
26	Bd Metabolites	30.54	11	8	1
27	Bd Metabolites	29.24	12	8	0
28	Bd Metabolites	22.56	8	4		23
29	Bd Metabolites	24.38	12	7	1
30	Bd Metabolites	30.58				28
31	Bd Metabolites	28.49			1
32	Bd Metabolites	25.65			0
33	Bd Metabolites	20.5			0
34	Bd Metabolites	29.55				22
35	Bd Metabolites	27.21				29
36	Bd Metabolites	22.14				18
37	Bd Metabolites	29.65	9	9		30
38	Bd Metabolites	30.3			0
39	Bd Metabolites	28.17	11	11	0
40	Bd Metabolites	28.61		13		26

## Sheet: Behavioral
Shrimp	Treatment	pre exposure- on dark side	number of post exposure obs	post exposure- on dark side	Death status
1	ASW control	100	2	50	1
2	ASW control	33.3333	0		1
3	ASW control	100	0		1
4	ASW control	100	6	100	0
5	ASW control	66.6667	5	100	1
6	ASW control	66.6667	5	40	1
7	ASW control	66.6667	3	66.6667	1
8	ASW control	66.6667	1	100	1
9	ASW control	66.6667	1	100	1
10	ASW control	66.6667	0		1
11	ASW control	66.6667	6	83.3333	0
12	ASW control	0	0		1
13	ASW control	100	3	66.6667	1
14	ASW control	66.6667	0		1
15	ASW control	100	6	50	0
16	ASW control	100	2	50	1
17	ASW control	0	0		1
18	ASW control	66.6667	5	60	1
19	ASW control	66.6667	3	33.3333	1
20	ASW control	66.6667	6	66.6667	0
21	Bd Metabolites	100	0		1
22	Bd Metabolites	100	0		1
23	Bd Metabolites	66.6667	6	66.6667	0
24	Bd Metabolites	66.6667	6	33.3333	1
25	Bd Metabolites	100	6	33.3333	0
26	Bd Metabolites	66.6667	6	33.3333	0
27	Bd Metabolites	66.6667	6	50	0
28	Bd Metabolites	100	0		1
29	Bd Metabolites	33.3333	6	16.6667	0
30	Bd Metabolites	0	0		1
31	Bd Metabolites	66.6667	6	66.6667	0
32	Bd Metabolites	100	6	100	0
33	Bd Metabolites	66.6667	6	83.3333	0
34	Bd Metabolites	100	1	100	1
35	Bd Metabolites	100	0		1
36	Bd Metabolites	100	2	0	1
37	Bd Metabolites	0	0		1
38	Bd Metabolites	33.3333	6	33.3333	0
39	Bd Metabolites	100	6	50	0
40	Bd Metabolites	66.6667	0		1

## Sheet: Height 
Shrimp	Treatment	average height pre-exposure	number of post exposure obs	average height post-exposure
1	ASW control	0	1	0
2	ASW control	0	0
3	ASW control		0
4	ASW control	0	6	0.166667
5	ASW control	0	3	0
6	ASW control	0.333333	3	0.333333
7	ASW control	1	2	0.5
8	ASW control	0	0
9	ASW control	0	1	0
10	ASW control	0	0
11	ASW control	0	6	0.333333
12	ASW control	0	0
13	ASW control	0.333333	2	0
14	ASW control		0
15	ASW control	0	6	0
16	ASW control	0	2	0
17	ASW control		0
18	ASW control	0	3	0
19	ASW control	0	2	0
20	ASW control	0.333333	6	1.33333
21	Bd Metabolites		0
22	Bd Metabolites	0	0
23	Bd Metabolites	0.333333	6	0
24	Bd Metabolites	0	4	0.875
25	Bd Metabolites	0	6	0.333333
26	Bd Metabolites	1.66667	6	0
27	Bd Metabolites	0	6	0.166667
28	Bd Metabolites		0
29	Bd Metabolites	0.666667	6	0.333333
30	Bd Metabolites		0
31	Bd Metabolites	0.333333	6	1.33333
32	Bd Metabolites	0	6	0
33	Bd Metabolites	0	6	0
34	Bd Metabolites	0.333333	0
35	Bd Metabolites	1	0
36	Bd Metabolites	0.666667	1	0
37	Bd Metabolites		0
38	Bd Metabolites	0	6	0.166667
39	Bd Metabolites	2	6	0.333333
40	Bd Metabolites	0	0

## Sheet: Activity + Gill
Shrimp	Treatment	Counts- Post exposure	Average Activity- post exposure	Gill Recession
1	ASW control	1	1	0.0403333
2	ASW control	0
3	ASW control	0
4	ASW control	6	1.16667	0.00533333
5	ASW control	3	1	0.00833333
6	ASW control	3	1.33333	0.006
7	ASW control	2	1.5	0.0176667
8	ASW control	0		0.0103333
9	ASW control	1	1	0.00333333
10	ASW control	0
11	ASW control	6	1.5	0.0103333
12	ASW control	0
13	ASW control	2	1.5	0.00166667
14	ASW control	0
15	ASW control	6	1	0.01
16	ASW control	2	1	0.014
17	ASW control	0
18	ASW control	3	1.33333	0.00633333
19	ASW control	2	1	0.00333333
20	ASW control	6	1.83333	0.01
21	Bd Metabolites	0
22	Bd Metabolites	0
23	Bd Metabolites	6	1	0.00533333
24	Bd Metabolites	4	1.25	0.00633333
25	Bd Metabolites	6	1.66667	0.008
26	Bd Metabolites	6	1	0.00633333
27	Bd Metabolites	6	1.5	0.00766667
28	Bd Metabolites
29	Bd Metabolites	6	1.66667	0.0253333
30	Bd Metabolites
31	Bd Metabolites	6	2	0.013
32	Bd Metabolites	6	1	0.0666667
33	Bd Metabolites	6	1	0.0346667
34	Bd Metabolites	0		0.004
35	Bd Metabolites	0
36	Bd Metabolites	1	1	0.0116667
37	Bd Metabolites
38	Bd Metabolites	6	1.33333	0.0156667
39	Bd Metabolites	6	1.33333	0.0466667
40	Bd Metabolites	0

## Sheet: Molts
Shrimp	Treatment	Counts post exposure	Total molts post exposure
1	ASW control	1	0
3	ASW control
4	ASW control	6	5
5	ASW control	4	0
6	ASW control	4	1
7	ASW control	2	0
9	ASW control	1	0
11	ASW control	6	3
13	ASW control	1	0
14	ASW control		0
15	ASW control	6	0
16	ASW control	2	0
17	ASW control		0
18	ASW control	3	0
19	ASW control	2	0
20	ASW control	6	3
21	Bd Metabolites
23	Bd Metabolites	6	3
24	Bd Metabolites	4	0
25	Bd Metabolites	6	2
26	Bd Metabolites	6	0
27	Bd Metabolites	6	2
28	Bd Metabolites
29	Bd Metabolites	6	3
30	Bd Metabolites
31	Bd Metabolites	6	1
32	Bd Metabolites	6	0
33	Bd Metabolites	6	0
36	Bd Metabolites	1	0
38	Bd Metabolites	6	1
39	Bd Metabolites	6	0
