# Supplementary material for: Exposure to Batrachochytrium dendrobatidis metabolites altered ghost shrimp behavior and reduced mortality
Source: PeerJ. 2025 Aug 7;13:e19815. doi: 10.7717/peerj.19815 (PMC12335830; doi:10.7717/peerj.19815)
Supplement: Supplemental Information 2 [file peerj-13-19815-s002.xlsx]

## Sheet: Sheet1
Code Book for Data to convert numbers to their respective factors
Dataset	Column header	Description of data
Mortality Data	Shrimp	Identification number assigned to each shrimp
Mortality Data	Treatment	Treatment each shrimp was exposed to: ASW = Artificial Spring Water & Bd Metabolites
Mortality Data	Expt day.After exposure	Experimental day after exposure to treatments
Mortality Data	Death status	Death status: 1 = shrimp died during the experiment, 0 = shrimp survived to the end of the experiment
Gill Data	shrimp	Identification number assigned to each shrimp
Gill Data	treatment	Treatment each shrimp was exposed to: ASW = Artificial Spring Water & Bd Metabolites
Gill Data	average	average recession (µm) of internal gill tissue from gill tip
Gill Data	Expt day.After exposure	Experimental day after exposure to treatments
length, heartrate + Poke	Shrimp	Identification number assigned to each shrimp
length, heartrate + Poke	Treatment	Treatment each shrimp was exposed to: ASW = Artificial Spring Water & Bd Metabolites
length, heartrate + Poke	initial length	total extended length of shrimp recorded at the beginning of the experiment
length, heartrate + Poke	initial heart rate	Heart rate of shrimp (beats/3 seconds) recorded at the beginning of the experiment
length, heartrate + Poke	final heart rate	Heart rate of shrimp (beats/3 seconds) recorded at the end of the experiment
length, heartrate + Poke	poke status	poke status: 1 = shrimp responded with an escape behavior when poked on the telson, 0 = shrimp did not respond with an escape behavior when poked on the telson
length, heartrate + Poke	Final Length	total extended length of shrimp recorded at the end of the experiment
Behavioral	Shrimp	Identification number assigned to each shrimp
Behavioral	Treatment	Treatment each shrimp was exposed to: ASW = Artificial Spring Water & Bd Metabolites
Behavioral	pre exposure- on dark side	Behavioral assay data: Percentage of time the shrimp spent on the dark side of the tank prior to treatment
Behavioral	number of post exposure obs	number of behavioral trials run after exposure to treatment
Behavioral	post exposure- on dark side	Behavioral assay data: Percentage of time the shrimp spent on the dark side of the tank after treatment
Behavioral	Death status	Death status: 1 = shrimp died during the experiment, 0 = shrimp survived to the end of the experiment
Height	Shrimp	Identification number assigned to each shrimp
Height	Treatment	Treatment each shrimp was exposed to: ASW = Artificial Spring Water & Bd Metabolites
Height	average height pre-exposure	average height (cm) of shrimp above container bottom pre treatment exposures
Height	number of post exposure obs	number of observations madeafter exposure to treatment
Height	average height post-exposure	average height (cm) of shrimp above container bottom post treatment exposures
Activity + Gill	Shrimp	Identification number assigned to each shrimp
Activity + Gill	Treatment	Treatment each shrimp was exposed to: ASW = Artificial Spring Water & Bd Metabolites
Activity + Gill	Counts- Post exposure	number of observations madeafter exposure to treatment
Activity + Gill	Average Activity- post exposure	average activity level per shrimp across all post exposure behavioral screenings (activity level: 1 = no activity, 2 = mild activity, 3 = swimming actively)
Activity + Gill	Gill Recession	average recession (µm) of internal gill tissue from gill tip
Molts	Shrimp	Shrimp	Identification number assigned to each shrimp
Molts	Treatment	Treatment	Treatment each shrimp was exposed to: ASW = Artificial Spring Water & Bd Metabolites
Molts	Counts post exposure	number of observations madeafter exposure to treatment
Molts	Total molts post exposure	total number of molts each shrimp experienced post treatment
